# Supplementary material for: Hepatitis B Virus Infection and Immunopathogenesis in a Humanized Mouse Model: Induction of Human-Specific Liver Fibrosis and M2-Like Macrophages
Source: PLOS journal article supplement (doi:10.1371/journal.ppat.1004032), 2014-03-20

A2/NSG - Fas HSC/Hep hu Mice - Tissue Leukocytes

*Gated on  
hCD45+ Cells*

*Gated on CD45+CD3-  
CD19-CD56-HLADR+*

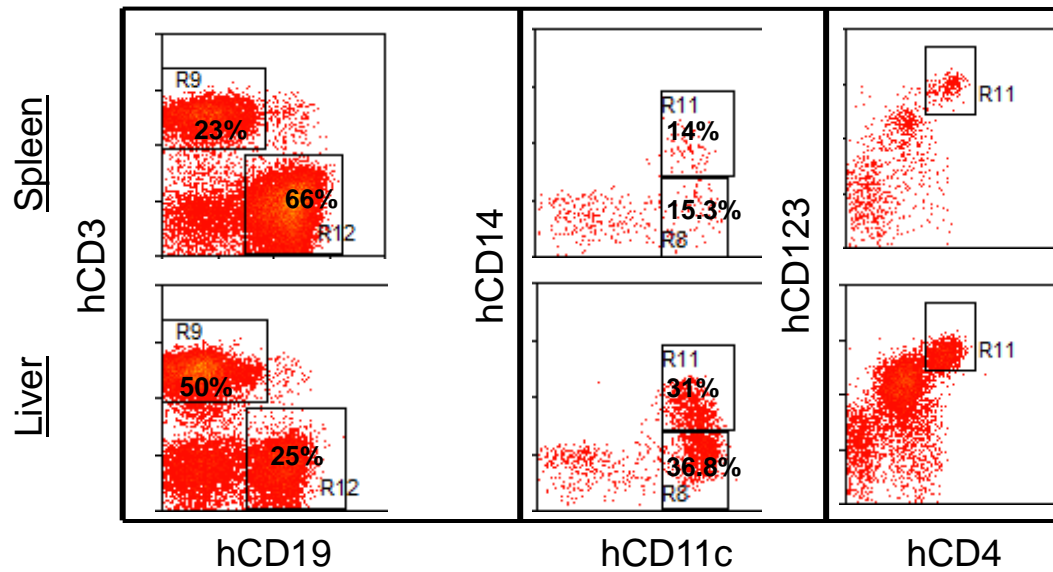

Supplement: S2 (10.1371/journal.ppat.1004032.s002) [file journal.ppat.1004032.s002.pdf › journal.ppat.1004032.s002.pdf]
