# Supplementary material for: Hepatitis B Virus Infection and Immunopathogenesis in a Humanized Mouse Model: Induction of Human-Specific Liver Fibrosis and M2-Like Macrophages
Source: PLOS journal article supplement (doi:10.1371/journal.ppat.1004032), 2014-03-20

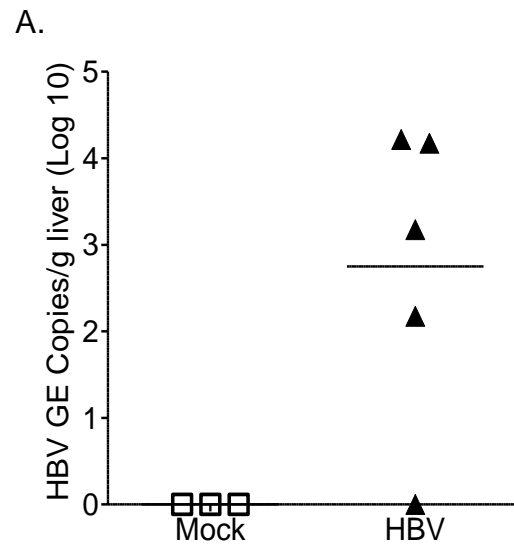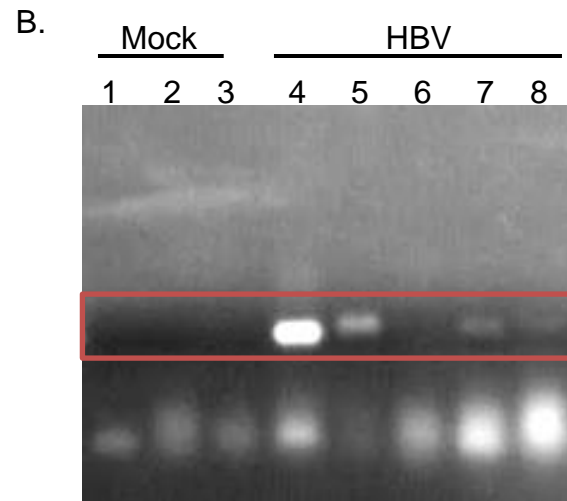

Supplement: S3 (10.1371/journal.ppat.1004032.s003) [file journal.ppat.1004032.s003.pdf › journal.ppat.1004032.s003.pdf]
