# Supplementary material for: Hepatitis B Virus Infection and Immunopathogenesis in a Humanized Mouse Model: Induction of Human-Specific Liver Fibrosis and M2-Like Macrophages
Source: PLOS journal article supplement (doi:10.1371/journal.ppat.1004032), 2014-03-20

Mock

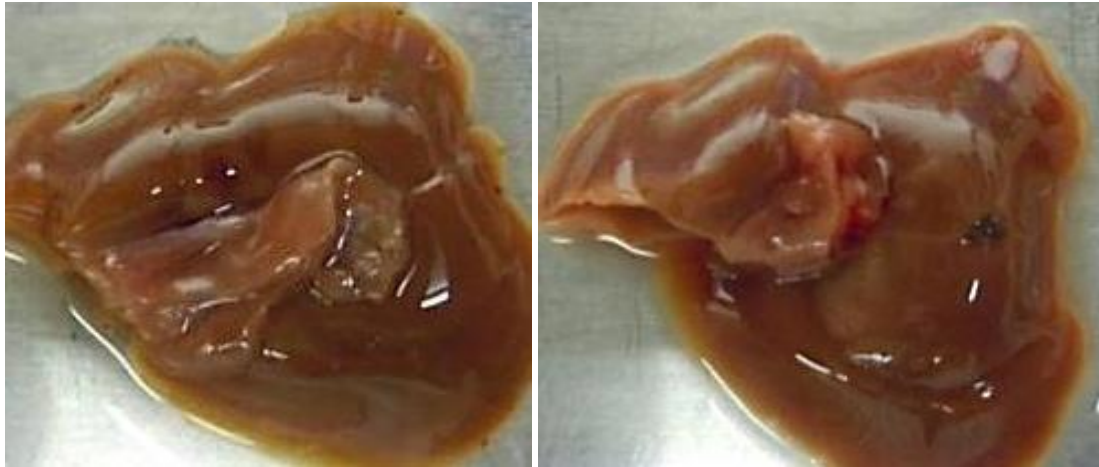

HBV

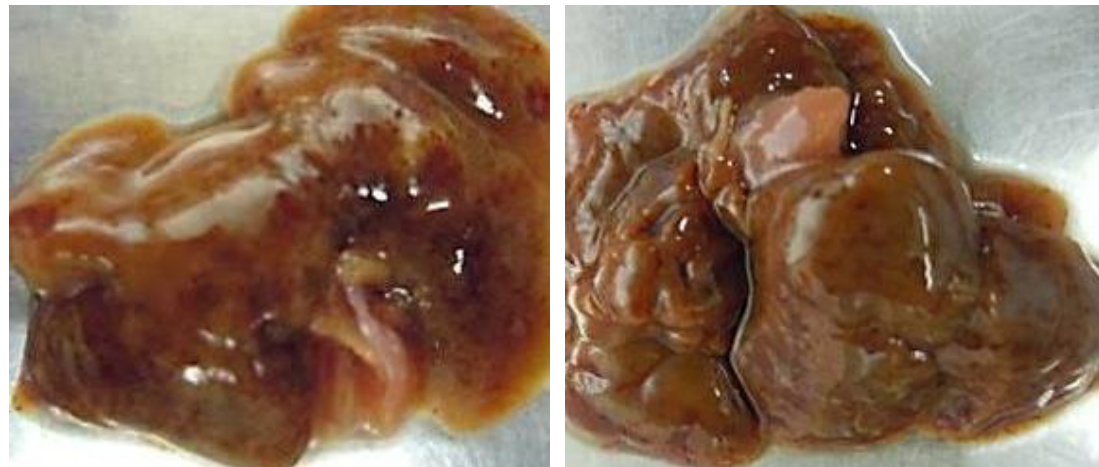

Supplement: S4 (10.1371/journal.ppat.1004032.s004) [file journal.ppat.1004032.s004.pdf › journal.ppat.1004032.s004.pdf]
