# Supplementary material for: Hepatitis B Virus Infection and Immunopathogenesis in a Humanized Mouse Model: Induction of Human-Specific Liver Fibrosis and M2-Like Macrophages
Source: PLoS Pathog. 2014 Mar 20;10(3):e1004032. doi: 10.1371/journal.ppat.1004032 (PMC3961374; doi:10.1371/journal.ppat.1004032)
Supplement: Table S1 — Chronic HBV infection induces liver disease in the humanized mouse model. Animal information and associated human reconstitution level, infection status, and liver disease score. (PDF) [file ppat.1004032.s010.pdf]

# Chronic HBV infection induces liver disease in the humanized mouse model

| ID   | Model       | %hCD45 | Serum hAlb<br>(ng/ml) | Inoculum  | WPI | Serum HBs<br>(ng/ml) | Liver HBc | Liver HBs | Knodell<br>Score |
|------|-------------|--------|-----------------------|-----------|-----|----------------------|-----------|-----------|------------------|
| 1168 | Hu-mice     | 87.1   | 40                    | Mock      | 14  | -                    | -         | -         | 0                |
| 1169 | Hu-mice     | 88.9   | 46                    | Mock      | 14  | -                    | -         | -         | 0                |
| 1170 | Hu-mice     | 95.2   | 52                    | Mock      | 14  | -                    | -         | -         | 0                |
| 1190 | Hu-mice     | 12.8   | 22                    | Mock      | 10  | -                    | -         | -         | 1                |
| 1447 | Hu-mice     | 92     | 67                    | Mock      | 12  | -                    | -         | -         | 0                |
| 1448 | Hu-mice     | 3      | 26                    | Mock      | 16  | -                    | -         | -         | 0                |
| 1434 | Hu-mice     | 89     | 51                    | HBV#2+Nab | 16  | -                    | -         | -         | 1                |
| 1435 | Hu-mice     | 91     | 30                    | HBV#2+Nab | 16  | -                    | -         | -         | 0                |
| 1436 | Hu-mice     | 84     | 91                    | HBV#2+Nab | 12  | -                    | -         | -         | 0                |
| 1189 | Hu-mice     | 70.8   | 72                    | HBV#1     | 14  | 9.7                  | +         | +         | 16               |
| 1191 | Hu-mice     | 78.4   | 106                   | HBV#1     | 6   | 6.25                 | +         | +         | 14               |
| 1192 | Hu-mice     | 35.4   | 14                    | HBV#1     | 10  | 3.29                 | NA        | NA        | NA               |
| 1193 | Hu-mice     | 93.2   | 118                   | HBV#1     | 13  | 7.3                  | +         | +         | 16               |
| 1441 | Hu-mice     | 20     | 146                   | HBV#2     | 11  | 8.8                  | NA        | NA        | NA               |
| 1442 | Hu-mice     | 66     | 189                   | HBV#2     | 16  | 6.3                  | +         | +         | 6                |
| 1450 | Hu-mice     | 94     | 300                   | HBV#2     | 16  | -                    | -         | -         | 0                |
| 1452 | Hu-mice     | 85     | 84                    | HBV#2     | 12  | 8.2                  | +         | +         | 10               |
| 1469 | Hu-mice     | 64     | 52                    | HBV#2     | 14  | 4.75                 | +         | +         | 17               |
| 1476 | Hu-mice     | 69     | 26                    | HBV#2     | 14  | -                    | -         | -         | 0                |
| 1477 | Hu-mice     | 79     | 97                    | HBV#2     | 14  | 4.84                 | +         | +         | 14               |
| 1    | Non-hu mice | 0      | 0                     | HBV#1     | 16  | -                    | -         | -         | 0                |
| 2    | Non-hu mice | 0      | 0                     | HBV#1     | 16  | -                    | -         | -         | 0                |
| 3    | Non-hu mice | 0      | 0                     | HBV#1     | 16  | -                    | -         | -         | 0                |
| 4    | Non-hu mice | 0      | 0                     | HBV#2     | 16  | -                    | -         | -         | 0                |
| 5    | Non-hu mice | 0      | 0                     | HBV#2     | 16  | -                    | -         | -         | 0                |
| 6    | Non-hu mice | 0      | 0                     | HBV#2     | 16  | -                    | -         | -         | 0                |

Notes: ID=Identification; Hu-mice=A2/NSG-hu HSC/Hep mouse; Non-hu mice=Non transplanted A2/NSG mouse; %hCD45=Human immune cells reconstitution levels relative to mouse immune cells; Serum hAlb=Serum human albumin levels; Inoculum=Mock (Vehicle; PBS), HBV#1 (HBV positive serum from patient #1), HBV#2 (HBV positive serum from patient #2), HBV#2+Nab (HBV positive serum from patient #1 incubated with neutralizing antibody prior to inoculation), WPI=Weeks post inoculation and time of death; NA=Not applicable (Animal was found dead); Serum HBs=Not detected (-) or concentration; Liver HBs=Not detected (-) or detected (+); Liver HBc=Not detected (-) or detected (+); Knodell=Liver histological activity score.
