# Supplementary material for: Hepatitis B Virus Infection and Immunopathogenesis in a Humanized Mouse Model: Induction of Human-Specific Liver Fibrosis and M2-Like Macrophages
Source: PLoS Pathog. 2014 Mar 20;10(3):e1004032. doi: 10.1371/journal.ppat.1004032 (PMC3961374; doi:10.1371/journal.ppat.1004032)
Supplement: Table S2 — Chronic HBV–induced liver disease and immune impairment is associated with M2-like macrophages in the humanized mouse model. Animal information, human reconstitution status, infection status, lymphoid and liver immune response, liver disease stage/score and associated liver M2-like macrophage levels. (PDF) [file ppat.1004032.s011.pdf]

Chronic HBV – induced liver disease and immune impairment is associated with “M2-like” macrophages in the humanized mouse model.

| ID   | Model       | Inoculum | Chronic HBV | Lymphoid T cells Immune Response | Liver T cells Immune Response | Liver Disease | Liver M2 MØ |
|------|-------------|----------|-------------|----------------------------------|-------------------------------|---------------|-------------|
| 1168 | Hu-mice     | Mock     | -           | -                                | NA*                           | -             | -           |
| 1169 | Hu-mice     | Mock     | -           | NA                               | NA                            | -             | -           |
| 1170 | Hu-mice     | Mock     | -           | -                                | NA*                           | -             | -           |
| 1190 | Hu-mice     | Mock     | -           | NA                               | NA                            | -             | -           |
| 1447 | Hu-mice     | Mock     | -           | -                                | -                             | -             | -           |
| 1448 | Hu-mice     | Mock     | -           | NA                               | NA                            | -             | -           |
| 1434 | Hu-mice     | HBV+Nab  | -           | -                                | -                             | -             | -           |
| 1435 | Hu-mice     | HBV+Nab  | -           | NA                               | NA                            | -             | -           |
| 1436 | Hu-mice     | HBV+Nab  | -           | NA                               | NA                            | -             | -           |
| 1189 | Hu-mice     | HBV      | +           | +                                | -                             | +++           | +++         |
| 1191 | Hu-mice     | HBV      | +           | +                                | NA                            | +++           | +++         |
| 1193 | Hu-mice     | HBV      | +           | NA                               | NA                            | +++           | +++         |
| 1442 | Hu-mice     | HBV      | +           | NA                               | NA                            | +             | +           |
| 1450 | Hu-mice     | HBV      | -           | NA                               | NA                            | -             | -           |
| 1452 | Hu-mice     | HBV      | +           | +                                | -                             | ++            | ++          |
| 1469 | Hu-mice     | HBV      | +           | +                                | -                             | +++           | +++         |
| 1476 | Hu-mice     | HBV      | -           | +                                | +                             | -             | -           |
| 1477 | Hu-mice     | HBV      | +           | +                                | -/+                           | +++           | +++         |
| 1    | Non-hu mice | HBV      | -           | NA                               | NA                            | -             | -           |
| 2    | Non-hu mice | HBV      | -           | NA                               | NA                            | -             | -           |
| 3    | Non-hu mice | HBV      | -           | NA                               | NA                            | -             | -           |
| 4    | Non-hu mice | HBV      | -           | NA                               | NA                            | -             | -           |
| 5    | Non-hu mice | HBV      | -           | NA                               | NA                            | -             | -           |
| 6    | Non-hu mice | HBV      | -           | NA                               | NA                            | -             | -           |

Notes: ID=Identification; Hu-mice=A2/NSG-hu HSC/Hep mouse; Non-hu mice=Non transplanted A2/NSG mouse; Inoculum=Mock (Vehicle; PBS), HBV#1 (HBV positive serum from patient #1), HBV#2 (HBV positive serum from patient #2), HBV#2+NAb (HBV positive serum from patient #1 incubated with neutralizing antibody prior to inoculation); Chronic HBV= Persistent HBV infection markers (HBV genome and antigens) detected in animal; Lymphoid/Liver T cells immune response=Refractory (-), Intermediate response (-/+), Responsive (+); NA (Not applicable, animals not tested, NA\* indicates animals had low number of T cells in the liver below the assay requirements); Liver disease=Relative liver disease score based on Knodell score, no liver disease (-), low grade liver disease (+), medium grade liver disease (+++), high grade liver disease (+++); Liver M2 MØ=Relative M2-like (hCD163+) macrophage levels, no M2 macrophages (-), low M2 macrophage level (+), intermediate M2 macrophage level (++), high M2 macrophage level (+++).
